# Supplementary figures and images for: Synergistic Stabilization of Nanoemulsion Using Nonionic Surfactants and Salt-Sensitive Cellulose Nanocrystals
Source: MDPI journal article supplement (doi:10.3390/polym15244682), 2023-12-12

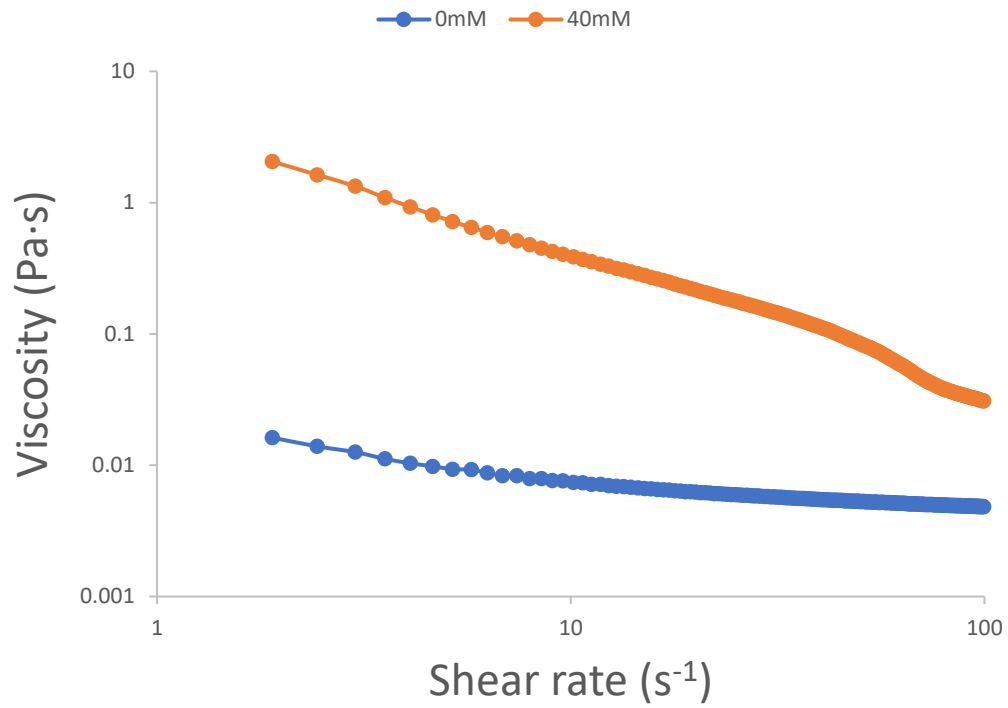

Figure S1 Effect of NaCl on the viscosity profile of 1 wt% soybean CNC

Supplement: s1 [file s1]
